# Supplementary material for: Improvement of high-glucose and insulin resistance of chromium malate in 3T3-L1 adipocytes by glucose uptake and insulin sensitivity signaling pathways and its mechanism
Source: PubMed Central journal article supplement — RSC Adv. 2018 Dec 21;9(1):114–27. doi: 10.1039/c8ra07470d (PMC9059288; doi:10.1039/c8ra07470d), 2018-12-21
Supplement: RA-009-C8RA07470D-s001.pdf [file RA-009-C8RA07470D-s001.pdf]

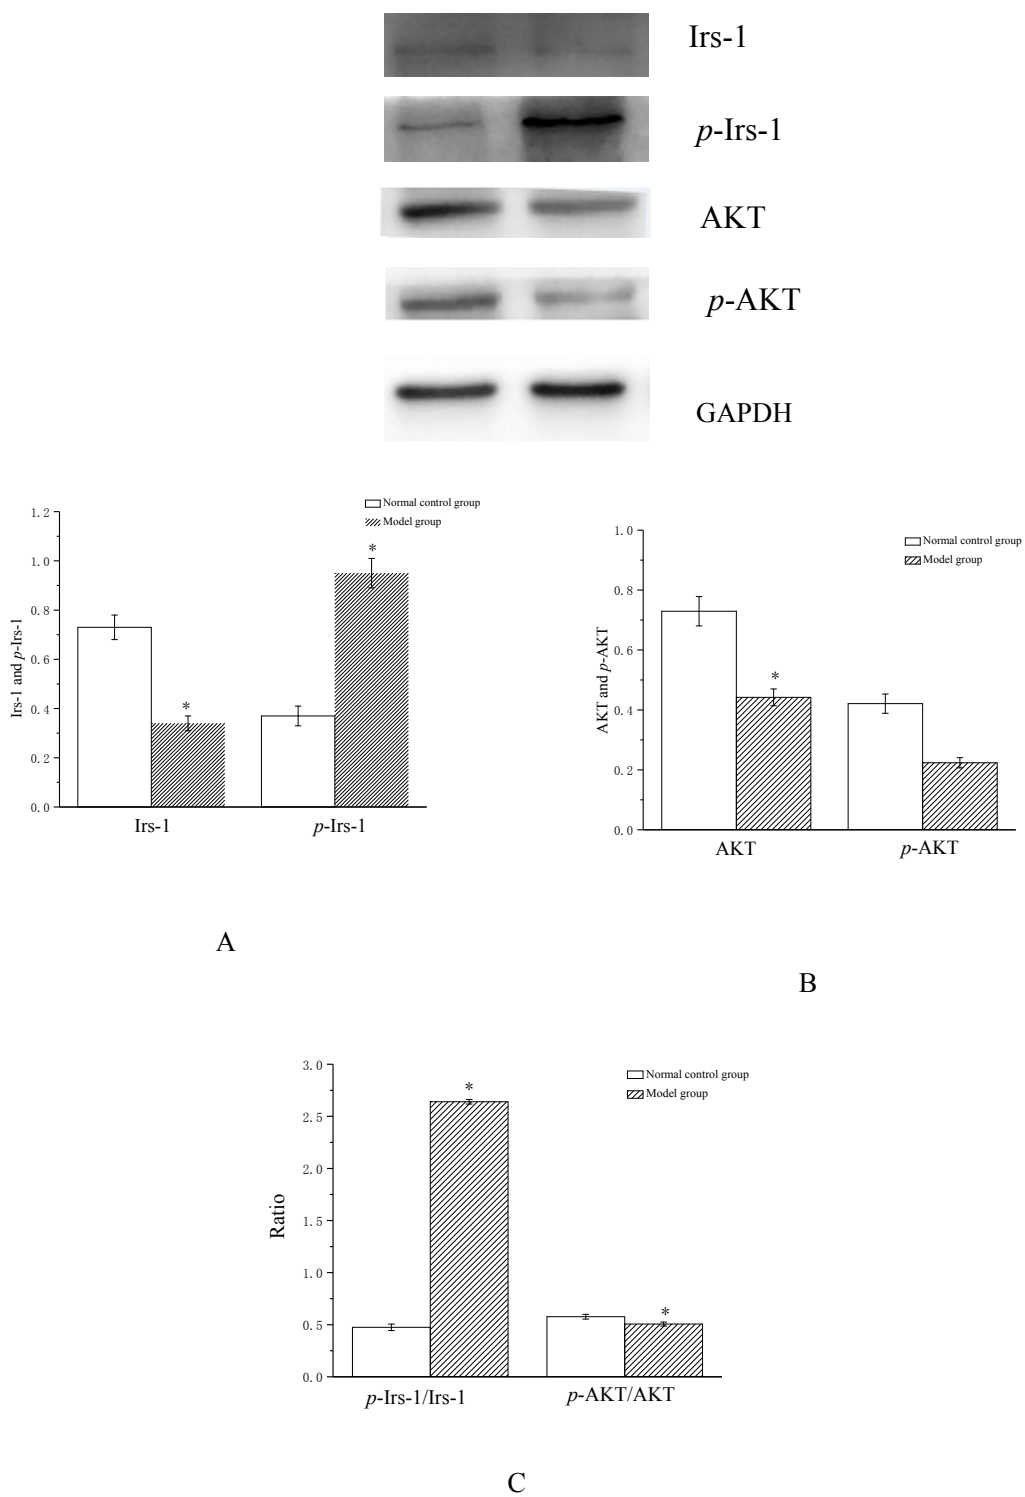

**Supplementary Fig. 1** The Irs-1 and p-Irs-1(A), AKT and p-AKT(B), p-Irs-1/ Irs-1 and p-AKT /AKT (C) changes of 3T3-L1 cells with insulin resistance or normal. Each value was presented as means $\pm$ SD (n=10).

\*Significantly different from normal group ( $p < 0.05$ ).

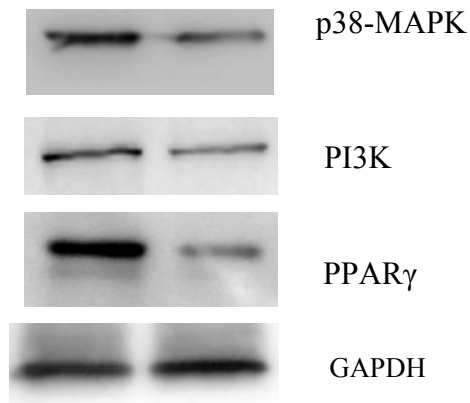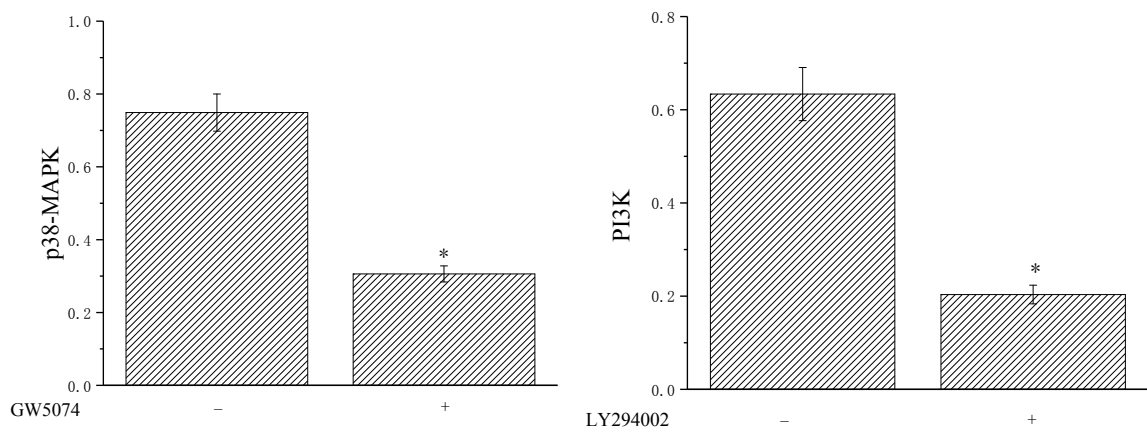

A

B

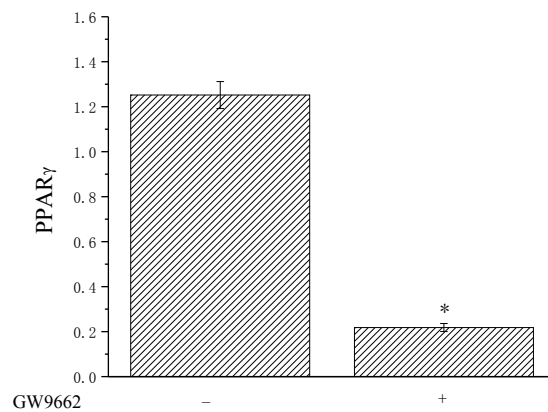

C

**Supplementary Fig 2.** The p38MAPK, PI3K and PPAR $\gamma$  changes of 3T3-L1 cells with insulin resistance after treatment of corresponding inhibitors. Each value was presented as means $\pm$ SD (n=10).

\*Significantly different from normal group ( $p < 0.05$ ).
